# Supplementary material for: Sanitation and Religion in South Asia: What Accounts for Differences across Countries?
Source: PubMed Central journal article supplement (PMC6183933; doi:10.1080/00220388.2018.1469742), 2018-05-18
Supplement: FJDS_A_1469742_SM8595.pdf [file FJDS_A_1469742_SM8595.pdf]

## Supplementary Appendix

### A1. Variable construction

In Bangladesh, 89.8 per cent of households are Muslim and 0.5 per cent are Christian or Buddhist, while Hindus comprise the largest minority. Hindus represent a majority in India and Nepal. In India, Muslims are the largest minority (11.5%), followed by Christians (2.3%), Sikhs (1.6%), Buddhists (0.8%), and Jains (0.07%). In Nepal, Buddhists are the largest minority (8.7%), followed by Muslims (3.4%), Kirati (1.7%), and Christians (1.5%).

In India, the DHS collected the religion of the household head. For Bangladesh and Nepal, however, the women interviewed in the household were individually asked their own religion. In 2 per cent of total households in Nepal and 0.1 per cent of total households in Bangladesh, the two or more women interviewed within the household responded that they adhere to different religions. For these households, we assign the religion that occurs most often among the women interviewed in the household. We drop households if no single religion occurs most often, which is the case for roughly half the inter-faith households in Nepal and most of the inter-faith households in Bangladesh. We also drop households in which no women were interviewed because data on religion was not recorded for these households.

**Figure A1: Cumulative distribution of rural asset ownership in rural Bangladesh, India, and Nepal**

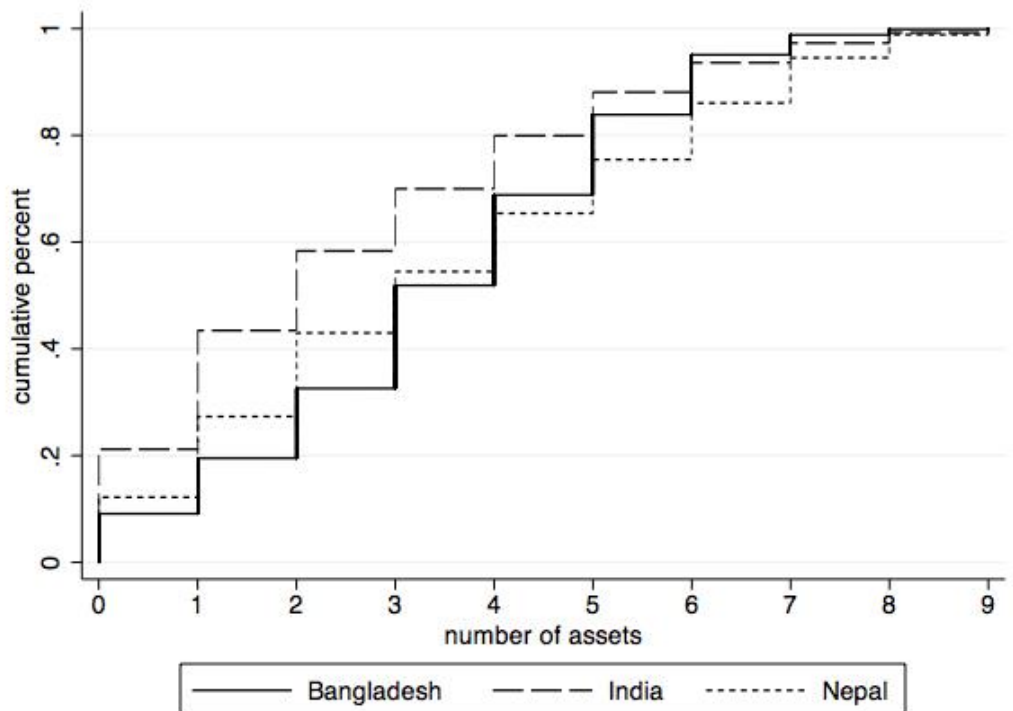

Figure presents the cumulative distribution functions of rural asset ownership, separately for Bangladesh, India, and Nepal.

**Figure A2: Differences in sanitation behaviour within and between Hindus and non-Hindus in rural Bangladesh, India, and Nepal**

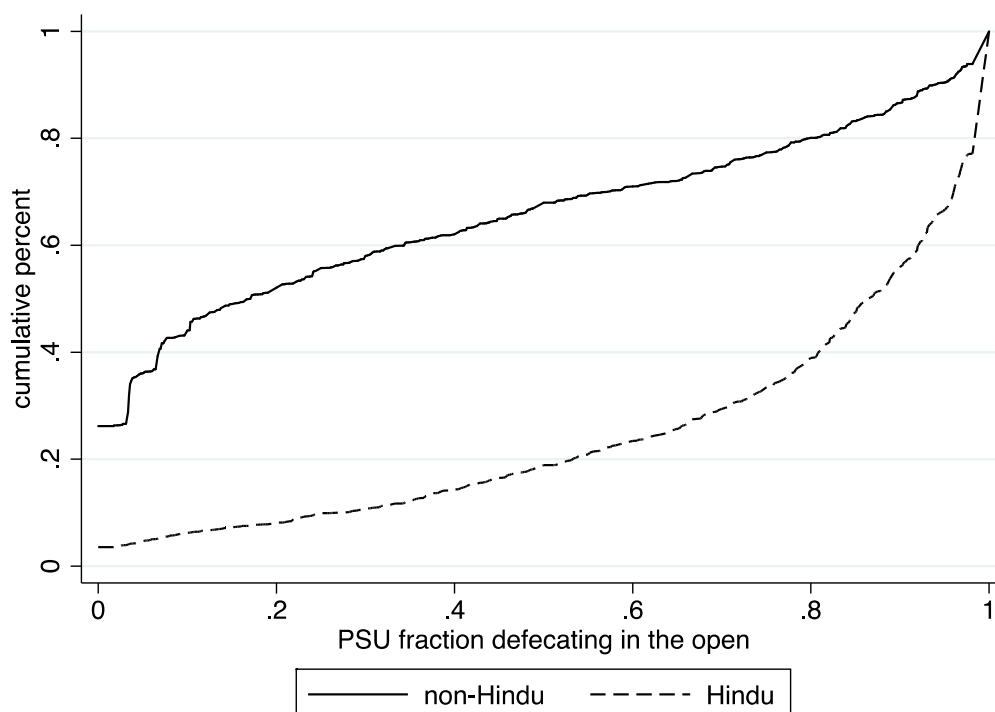

Figure presents the cumulative distribution functions of the PSU fraction of households defecating in the open, separately for Hindus and non-Hindus.

**Table A1: Description of DHS surveys and data availability**

| country     | survey year                   | DHS sample size | Data availability |          |             |              |          |        |
|-------------|-------------------------------|-----------------|-------------------|----------|-------------|--------------|----------|--------|
|             |                               |                 | sanitation        | religion | electricity | pipeds water | literacy | assets |
| Afghanistan | 2010                          | 22,351          | x                 |          | x           | x            |          | x      |
| Bangladesh  | 2011                          | 17,141          | x                 | x        | x           | x            | x        | x      |
| Bhutan      | No available DHS              |                 |                   |          |             |              |          |        |
| India       | 2005-2006                     | 109,041         | x                 | x        | x           | x            | x        | x      |
| Maldives    | 2009                          | 6,443           | x                 |          | x           | x            |          | x      |
| Nepal       | 2011                          | 10,826          | x                 | x        | x           | x            | x        | x      |
| Pakistan    | 2012-2013                     | 12,943          | x                 |          | x           | x            | x        | x      |
| Sri Lanka   | Last available data from 1987 |                 |                   |          |             |              |          |        |

**Table A2: Open defecation and Hinduism in divisions, states, and regions, in Bangladesh, India, and Nepal, respectively**

| country    | division/state/region | total per cent  |       | rural per cent  |
|------------|-----------------------|-----------------|-------|-----------------|
|            |                       | open defecation | Hindu | open defecation |
| (1)        | (2)                   | (3)             | (4)   | (5)             |
| Bangladesh | Rangpur               | 12.4%           | 15.9% | 14.4%           |
| Bangladesh | Rajshahi              | 3.8%            | 5.8%  | 5.1%            |
| Bangladesh | Dhaka                 | 3.8%            | 4.6%  | 6.4%            |
| Bangladesh | Sylhet                | 3.3%            | 14.4% | 4.8%            |
| Bangladesh | Chittagong            | 2.0%            | 8.2%  | 2.9%            |
| Bangladesh | Khulna                | 1.8%            | 10.6% | 2.5%            |
| Bangladesh | Barisal               | 1.6%            | 7.9%  | 1.9%            |
| India      | Chhattisgarh          | 74.9%           | 93.9% | 94.4%           |
| India      | Orissa                | 74.3%           | 96.3% | 88.6%           |
| India      | Jharkhand             | 70.0%           | 74.2% | 95.0%           |
| India      | Rajasthan             | 64.9%           | 87.7% | 91.6%           |
| India      | Bihar                 | 61.7%           | 82.6% | 83.8%           |
| India      | Karnataka             | 54.7%           | 85.5% | 78.1%           |
| India      | Uttar Pradesh         | 54.5%           | 78.9% | 84.0%           |
| India      | Madhya Pradesh        | 50.5%           | 88.3% | 90.4%           |
| India      | Haryana               | 49.5%           | 88.0% | 64.5%           |
| India      | Tamil Nadu            | 47.0%           | 88.3% | 83.0%           |
| India      | Gujarat               | 45.7%           | 90.5% | 69.8%           |
| India      | Himachal Pradesh      | 43.1%           | 95.3% | 59.9%           |
| India      | Uttaranchal           | 41.5%           | 86.9% | 57.7%           |
| India      | Jammu and Kashmir     | 36.8%           | 37.9% | 49.1%           |
| India      | Andhra Pradesh        | 34.5%           | 77.9% | 73.1%           |
| India      | Punjab                | 29.5%           | 42.9% | 44.0%           |
| India      | Maharashtra           | 29.4%           | 75.8% | 79.5%           |
| India      | West Bengal           | 26.6%           | 73.5% | 55.1%           |
| India      | Goa                   | 26.1%           | 65.2% | 38.2%           |
| India      | Meghalaya             | 22.3%           | 19.5% | 38.3%           |
| India      | Assam                 | 19.8%           | 72.2% | 28.9%           |
| India      | Arunachal Pradesh     | 18.9%           | 34.1% | 25.4%           |
| India      | Nagaland              | 10.3%           | 15.9% | 19.5%           |
| India      | Delhi                 | 10.2%           | 85.4% | 28.0%           |
| India      | Sikkim                | 8.7%            | 59.0% | 13.7%           |
| India      | Kerala                | 3.8%            | 59.5% | 4.9%            |
| India      | Manipur               | 3.7%            | 56.6% | 6.4%            |
| India      | Tripura               | 2.9%            | 88.9% | 3.8%            |
| India      | Mizoram               | 2.0%            | 3.0%  | 4.2%            |
| Nepal      | Mountain              | 35.6%           | 62.2% | 37.8%           |
| Nepal      | Terai                 | 33.6%           | 74.3% | 45.3%           |
| Nepal      | Hill                  | 29.2%           | 68.6% | 37.4%           |

Means calculated using sampling weights.
